# Supplementary material for: Solvent-driven azide-induced mononuclear discreteversusone-dimensional polymeric aromatic Möbius cadmium(ii) complexes of an N6tetradentate helical ligand
Source: Royal Society of Chemistry journal article supplement (doi:10.1039/c7dt02952g), 2017-01-01
Supplement: c7dt02952g1.pdf [file c7dt02952g1.pdf]

## Electronic Supplementary Information

### Solvent-driven azide-induced mononuclear discrete versus one-dimensional polymeric aromatic Möbius cadmium(II) complexes of N<sub>6</sub> tetradentate helical ligand

Farhad Akbari Afkhami,<sup>a,b</sup> Ghodrat Mahmoudi,<sup>\*c</sup> Atash V. Gurbanov,<sup>d,e</sup> Fedor I. Zubkov,<sup>e</sup>  
Fengrui Qu,<sup>b</sup> Arunava Gupta<sup>\*a,b</sup> and Damir A. Safin<sup>\*f</sup>

<sup>a</sup>Center for Material and Information technology, The University of Alabama, Box 870209, 2007 Bevil Building, Tuscaloosa, Alabama 35487, United States. E-mail: agupta@mint.ua.edu

<sup>b</sup>Department of Chemistry, The University of Alabama, Box 870336, 250 Hackberry Lane, Tuscaloosa, Alabama 35487, United States

<sup>c</sup>Department of Chemistry, Faculty of Science, University of Maragheh, P.O. Box 55181-83111, Maragheh, Iran. E-mail: mahmoudi\_ghodrat@yahoo.co.uk

<sup>d</sup>Organic Chemistry Department, RUDN University, Miklukho-Maklaya str. 6, 117198 Moscow, Russian Federation

<sup>e</sup>Department of Chemistry, Baku State University, Z. Xalilov Str. 23, AZ1148, Baku, Azerbaijan

<sup>f</sup>Institute of Condensed Matter and Nanosciences, Molecules, Solids and Reactivity (IMCN/MOST), Université catholique de Louvain, Place L. Pasteur 1, 1348 Louvain-la-Neuve, Belgium. E-mail: damir.a.safin@gmail.com

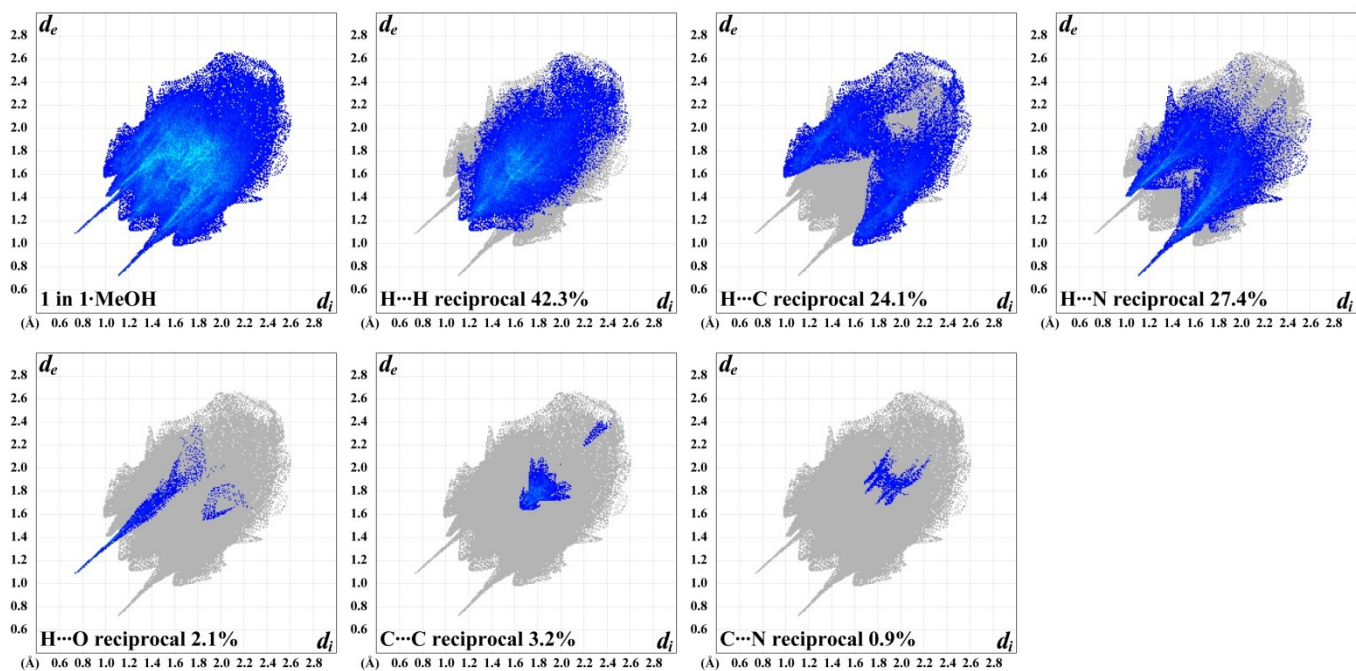

**Fig. S1.** 2D and decomposed 2D fingerprint plots of observed contacts for **1** in 1-MeOH.

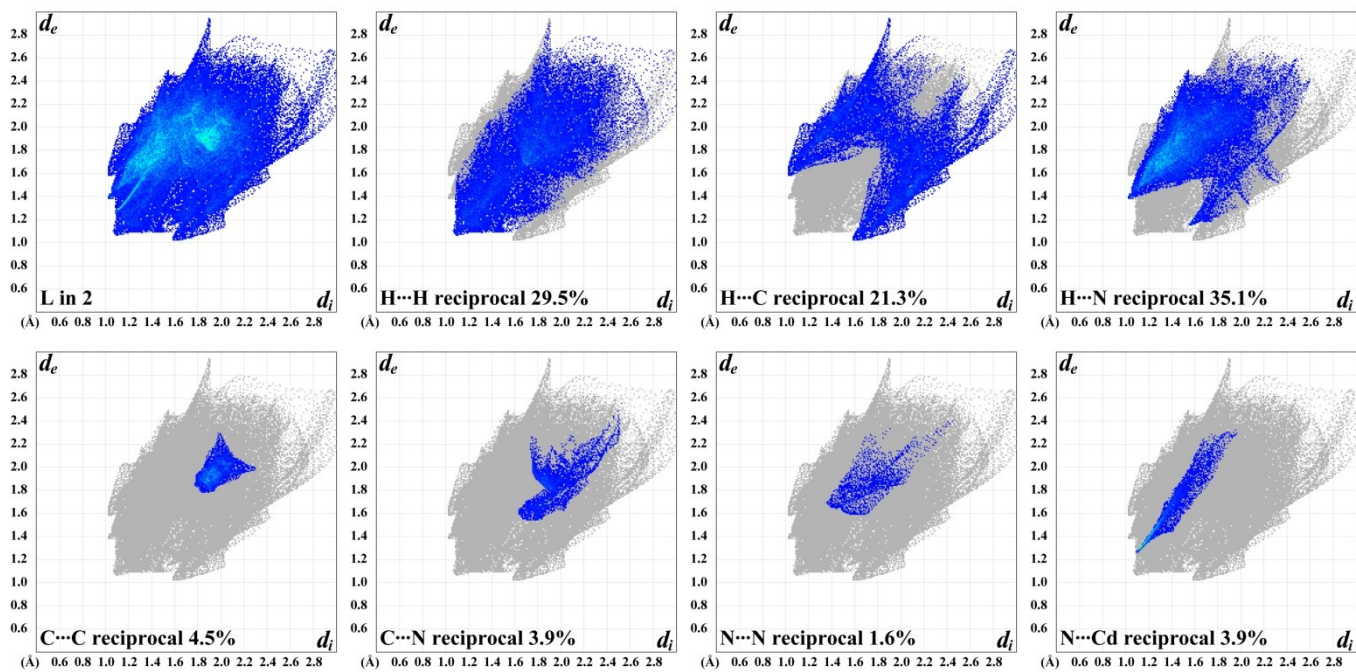

**Figure S2.** 2D and decomposed 2D fingerprint plots of observed contacts for **L** in **2**.

**Table S1.** Selected bond lengths (Å) and angles (°) for **1·MeOH** and **2**

|                                                                              | Complex 1·MeOH                             | Complex 2                                                                                                                                                                                                                                                                                                                               |
|------------------------------------------------------------------------------|--------------------------------------------|-----------------------------------------------------------------------------------------------------------------------------------------------------------------------------------------------------------------------------------------------------------------------------------------------------------------------------------------|
| <i>Bond lengths</i>                                                          |                                            |                                                                                                                                                                                                                                                                                                                                         |
| Cd–N <sub>Py</sub>                                                           | 2.372(2), 2.378(2)                         | 2.3512(14), 2.3866(14)                                                                                                                                                                                                                                                                                                                  |
| Cd–N <sub>imine</sub>                                                        | 2.480(2), 2.533(2)                         | 2.3874(13), 2.3894(13)                                                                                                                                                                                                                                                                                                                  |
| Cd–N <sub>azide</sub>                                                        | 2.270(2), 2.327(2)                         | 2.283(2), 2.304(2)                                                                                                                                                                                                                                                                                                                      |
| Cd–O <sub>methanol</sub>                                                     | 2.539(2)                                   | —                                                                                                                                                                                                                                                                                                                                       |
| Cd(L)···Cd(L)                                                                | 7.941 (the shortest separation)            | 8.912                                                                                                                                                                                                                                                                                                                                   |
| Cd(L)···Cd(N <sub>azide</sub> ) <sub>6</sub>                                 | —                                          | 5.618, 5.892                                                                                                                                                                                                                                                                                                                            |
| Cd(N <sub>azide</sub> ) <sub>6</sub> ···Cd(N <sub>azide</sub> ) <sub>6</sub> | —                                          | 3.538, 5.404                                                                                                                                                                                                                                                                                                                            |
| Cd–μ <sub>1,3</sub> -N <sub>azide</sub> (–CdL)                               | —                                          | 2.320(2), 2.330(2)                                                                                                                                                                                                                                                                                                                      |
| Cd–μ <sub>1,1</sub> -N <sub>azide</sub>                                      | —                                          | 2.2702(13), 2.2801(13)                                                                                                                                                                                                                                                                                                                  |
| Cd–μ <sub>1,1,1</sub> -N <sub>azide</sub>                                    | —                                          | 2.3933(13), 2.4033(12), 2.4428(13)                                                                                                                                                                                                                                                                                                      |
| Cd–μ <sub>1,3</sub> -N <sub>azide</sub>                                      | —                                          | 2.304(2), 2.308(2)                                                                                                                                                                                                                                                                                                                      |
| Cd–μ <sub>1,1,3</sub> -N <sub>azide</sub>                                    | —                                          | 2.3359(14), 2.363(2), 2.4329(13)                                                                                                                                                                                                                                                                                                        |
| <i>Bond Angles</i>                                                           |                                            |                                                                                                                                                                                                                                                                                                                                         |
| N <sub>Py</sub> –Cd–N <sub>Py</sub>                                          | 168.91(6)                                  | 163.35(5)                                                                                                                                                                                                                                                                                                                               |
| N <sub>Py</sub> –Cd–N <sub>imine</sub>                                       | 65.56(6), 66.53(6), 124.03(6), 124.08(6)   | 67.72(4), 67.81(5), 124.96(5), 128.45(5)                                                                                                                                                                                                                                                                                                |
| N <sub>Py</sub> –Cd–N <sub>azide</sub>                                       | 85.57(6), 88.26(7), 88.76(7), 93.18(6)     | 81.09(6), 87.08(6), 87.27(6), 90.04(6)                                                                                                                                                                                                                                                                                                  |
| N <sub>Py</sub> –Cd–O <sub>methanol</sub>                                    | 82.04(6), 87.00(6)                         | —                                                                                                                                                                                                                                                                                                                                       |
| N <sub>imine</sub> –Cd–N <sub>imine</sub>                                    | 168.91(6)                                  | 77.52(4)                                                                                                                                                                                                                                                                                                                                |
| N <sub>imine</sub> –Cd–N <sub>azide</sub>                                    | 77.25(6), 82.64(6), 118.28(7), 119.03(6)   | 88.06(6), 93.05(5), 130.95(6), 139.09(5)                                                                                                                                                                                                                                                                                                |
| N <sub>imine</sub> –Cd–O <sub>methanol</sub>                                 | 140.16(6), 146.41(6)                       | —                                                                                                                                                                                                                                                                                                                                       |
| N <sub>azide</sub> –Cd(L)–N <sub>azide</sub>                                 | 157.64(7)                                  | 125.13(6)                                                                                                                                                                                                                                                                                                                               |
| N <sub>azide</sub> –Cd–O <sub>methanol</sub>                                 | 75.03(6), 83.21(6)                         | —                                                                                                                                                                                                                                                                                                                                       |
| N <sub>azide</sub> –Cd–N <sub>azide</sub>                                    | —                                          | 75.94(4), 77.58(4), 79.66(4), 80.01(5),<br>81.28(5), 85.89(5), 86.10(6), 87.86(5),<br>89.99(5), 90.01(7), 90.16(4), 90.28(5),<br>90.80(6), 91.37(6), 92.50(6), 92.73(6),<br>93.45(5), 93.58(5), 94.71(5), 94.88(6),<br>96.70(6), 96.76(5), 103.96(5), 105.75(7),<br>162.69(6), 163.23(5), 167.72(5), 169.94(6),<br>174.49(5), 176.08(6) |
| <i>Torsion angles</i>                                                        |                                            |                                                                                                                                                                                                                                                                                                                                         |
| N–C(Ph)–C(Ph)–N                                                              | 75.03(6)                                   | 76.5(2)                                                                                                                                                                                                                                                                                                                                 |
| C(Ph)–N–N–C                                                                  | 121.7(2), 137.72(19)                       | 119.18(15), 125.21(16)                                                                                                                                                                                                                                                                                                                  |
| Py···Py                                                                      | 69.00(10)                                  | 60.47(9)                                                                                                                                                                                                                                                                                                                                |
| Py···Ph                                                                      | 51.00(10), 68.65(10), 68.79(10), 76.56(10) | 62.21(9), 66.81(9), 67.46(9), 83.39(10)                                                                                                                                                                                                                                                                                                 |
| Ph···Ph                                                                      | 86.46(10)                                  | 88.44(9)                                                                                                                                                                                                                                                                                                                                |

**Table S2.** Classic hydrogen bond lengths (Å) and angles (°) for **1·MeOH**

| D–H···A                       | <i>d</i> (D–H) | <i>d</i> (H···A) | <i>d</i> (D···A) | ∠(DHA) |
|-------------------------------|----------------|------------------|------------------|--------|
| O(1)–H(1)···O(2) <sup>a</sup> | 0.88(4)        | 1.93(4)          | 2.781(2)         | 164(3) |
| O(2)–H(2)···N(4)              | 0.88(4)        | 1.94(4)          | 2.787(3)         | 161(4) |

<sup>a</sup>Symmetry transformations used to generate equivalent atoms:  $-x, 1-y, 1-z$ .

**Table S3.**  $\pi$ ··· $\pi$  interaction distances (Å) and angles (°) for **1·MeOH** and **2<sup>c</sup>**

| Complex                   | Cg( <i>l</i> ) | Cg( <i>J</i> )       | <i>d</i> [Cg( <i>l</i> )–Cg( <i>J</i> )] | $\alpha$ | $\beta$ | $\gamma$ | slippage |
|---------------------------|----------------|----------------------|------------------------------------------|----------|---------|----------|----------|
| <b>1·MeOH<sup>b</sup></b> | Cg(1)          | Cg(1) <sup>#1</sup>  | 3.6360(12)                               | 0.02(10) | 20.9    | 20.9     | 1.298    |
|                           | Cg(2)          | Cg(2) <sup>#2</sup>  | 3.7038(12)                               | 0.00(10) | 25.5    | 25.5     | 1.592    |
| <b>2<sup>c</sup></b>      | Cg(15)         | Cg(16) <sup>#1</sup> | 3.7242(11)                               | 0.00(10) | 12.1    | 12.1     | 0.783    |
|                           | Cg(16)         | Cg(15) <sup>#2</sup> | 3.7003(10)                               | 0.00(8)  | 14.9    | 14.9     | 0.954    |

<sup>a</sup>Cg(*l*)–Cg(*J*): distance between ring centroids;  $\alpha$ : dihedral angle between planes Cg(*l*) and Cg(*J*);  $\beta$ : angle Cg(*l*) → Cg(*J*) vector and normal to plane *l*;  $\gamma$ : angle Cg(*l*) → Cg(*J*) vector and normal to plane *J*; slippage: distance between Cg(*l*) and perpendicular projection of Cg(*J*) on ring *l*.

<sup>b</sup>Symmetry transformations used to generate equivalent atoms: #1  $-x, 1-y, -z$ ; #2  $1-x, 1-y, 1-z$ . Cg(1): N(11)–C(12)–C(13)–C(14)–C(15)–C(16), Cg(2): N(30)–C(25)–C(26)–C(27)–C(28)–C(29).

<sup>c</sup>Symmetry transformations used to generate equivalent atoms: #1  $1-x, 1-y, 1-z$ ; #2  $1-x, -y, 1-z$ . Cg(15): N(1)–C(2)–C(3)–C(4)–C(5)–C(6), Cg(16): N(6)–C(24)–C(25)–C(26)–C(27)–C(28).

**Table S4.** C–H··· $\pi$  and N–N··· $\pi$  interaction distances (Å) and angles (°) for **1·MeOH** and **2<sup>a</sup>**

| Complex                   | X–Y( <i>l</i> ) | Cg( <i>J</i> )       | <i>d</i> [Y( <i>l</i> )–Cg( <i>J</i> )] | <i>d</i> [X–Cg( <i>J</i> )] | ∠XYCg)     | $\gamma$ |
|---------------------------|-----------------|----------------------|-----------------------------------------|-----------------------------|------------|----------|
| <b>1·MeOH<sup>b</sup></b> | C(13)–H(13)     | Cg(4) <sup>#1</sup>  | 2.48                                    | 3.320(2)                    | 147        | 7.97     |
|                           | C(33)–H(33)     | Cg(2) <sup>#2</sup>  | 2.76                                    | 3.655(2)                    | 156        | 11.62    |
|                           | C(40)–H(40)     | Cg(3) <sup>#3</sup>  | 2.70(3)                                 | 3.604(2)                    | 163(3)     | 8.84     |
| <b>2<sup>c</sup></b>      | C(2)–H(2)       | Cg(18) <sup>#1</sup> | 2.70                                    | 3.589(2)                    | 158        | 14.83    |
|                           | N(17)–N(18)     | Cg(17) <sup>#2</sup> | 3.580(2)                                | 3.9426(17)                  | 100.04(12) | 28.11    |

<sup>a</sup>Y(*l*)–Cg(*J*): distance of Y to ring centroid; X–Cg(*J*): distance of X to ring centroid; ∠(XYCg): angle X–Y–Cg;  $\gamma$ : angle Y(*l*) → Cg(*J*) vector and normal to plane *J*.

<sup>b</sup>Symmetry transformations used to generate equivalent atoms: #1  $-x, 1-y, -z$ ; #2  $x, -1+y, z$ ; #3  $1-x, -y, -z$ . Cg(2): N(30)–C(25)–C(26)–C(27)–C(28)–C(29), Cg(3): C(31)–C(32)–C(33)–C(34)–C(35)–C(36), Cg(4): C(37)–C(38)–C(39)–C(40)–C(41)–C(42).

<sup>c</sup>Symmetry transformations used to generate equivalent atoms: #1  $2-x, 1-y, 1-z$ ; #2  $1-x, -y, 1-z$ . Cg(17): C(9)–C(10)–C(11)–C(12)–C(13)–C(14), Cg(18): C(16)–C(17)–C(18)–C(19)–C(20)–C(21).
